# Supplementary material for: The dodeca-coordinated La©B8C4+/0/− molecular wheels: conflicting aromaticity versus double aromaticity
Source: Royal Society of Chemistry journal article supplement (doi:10.1039/d2ra07155j), 2023-01-01
Supplement: d2ra07155j1.pdf [file d2ra07155j1.pdf]

## SUPPLEMENTARY INFORMATION

### The Dodeca-Coordinated La@B<sub>8</sub>C<sub>4</sub><sup>+/0/-</sup> Molecular Wheels: Conflicting Aromaticity versus Double Aromaticity†

Ying-Jin Wang,\* Jia-Xin Zhao, Miao Yan, Lin-Yan Feng, Chang-Qing Miao, and Cheng-Qi Liu

*Department of Chemistry, Xinzhou Teachers University, Xinzhou 034000, Shanxi, China*

\*E-mail: yingjinwang@sxu.edu.cn

### Supplementary Information

- Table S1.** Cartesian coordinates for the C<sub>4v</sub> (<sup>1</sup>A<sub>1</sub>) GM La@B<sub>8</sub>C<sub>4</sub><sup>+</sup>, C<sub>4v</sub> (<sup>2</sup>B<sub>1</sub>) GM La@B<sub>8</sub>C<sub>4</sub>, and D<sub>4h</sub> (<sup>1</sup>A<sub>1g</sub>) LM La@B<sub>8</sub>C<sub>4</sub><sup>-</sup> clusters at B3LYP level.
- Figure S1.** Alternative optimized Low-lying isomers of La@B<sub>8</sub>C<sub>4</sub><sup>+</sup> cluster. The relative energies are shown at the single-point CCSD(T) (for top five), B3LYP (in square brackets) and PBE0 (in curly brackets) levels, respectively. The relative energies at the B3LYP and PBE0 levels are corrected with the zero-point energies (ZPEs). All energies are in eV.
- Figure S2** The top eleven Low-lying isomers of La@B<sub>8</sub>C<sub>4</sub> cluster. The relative energies are shown at the single-point CCSD(T) (for top five), B3LYP (in square brackets) and PBE0 (in curly brackets) levels, respectively. The relative energies at the B3LYP and PBE0 levels are corrected with the zero-point energies (ZPEs). All energies are in eV.
- Figure S3** The top ten Low-lying isomers of La@B<sub>8</sub>C<sub>4</sub><sup>-</sup> cluster. The relative energies are shown at the single-point CCSD(T) (for top five), B3LYP (in square brackets)

and PBE0 (in curly brackets) levels, respectively. The relative energies at the B3LYP and PBE0 levels are corrected with the zero-point energies (ZPEs). All energies are in eV.

**Figure S4.** Calculated Wiberg bond indices (WBIs) of the  $C_{4v}$  ( $^1A_1$ ) GM  $\text{La}^\oplus\text{B}_8\text{C}_4^+$ ,  $C_{4v}$  GM ( $^2B_1$ )  $\text{La}^\oplus\text{B}_8\text{C}_4$  and  $D_{4h}$  ( $^1A_{1g}$ ) LM  $\text{La}^\oplus\text{B}_8\text{C}_4^-$  clusters from the natural bond orbital (NBO) analyses at B3LYP level.

**Figure S5.** Calculated natural atomic charges of the  $C_{4v}$  ( $^1A_1$ ) GM  $\text{La}^\oplus\text{B}_8\text{C}_4^+$ , GM  $C_{4v}$  ( $^2B_1$ )  $\text{La}^\oplus\text{B}_8\text{C}_4$  and  $D_{4h}$  LM ( $^1A_{1g}$ )  $\text{La}^\oplus\text{B}_8\text{C}_4^-$  clusters from the NBO analyses at B3LYP level.

**Figure S6.** Occupied canonical molecular orbitals (CMOs) of the  $C_{4v}$  ( $^1A_1$ ) GM  $\text{La}^\oplus\text{B}_8\text{C}_4^+$  cluster. (a) Twelve  $\sigma$  CMOs for two-center two-electron (2c-2e) B–C/B–B Lewis  $\sigma$  bonds in  $\text{B}_8\text{C}_4$  ring. (b) Five delocalized  $\sigma$  CMOs in  $\text{La}^\oplus\text{B}_8\text{C}_4^+$ . (c) Four delocalized  $\pi$  CMOs in  $\text{La}^\oplus\text{B}_8\text{C}_4^+$ .

**Figure S7.** Occupied canonical molecular orbitals (CMOs) of the  $D_{4h}$  ( $^1A_{1g}$ ) LM  $\text{La}^\oplus\text{B}_8\text{C}_4^-$  cluster. (a) Twelve  $\sigma$  CMOs for 2c-2e B–C/B–B Lewis  $\sigma$  bonds in  $\text{B}_8\text{C}_4$  ring. (b) Five delocalized  $\sigma$  CMOs in  $\text{La}^\oplus\text{B}_8\text{C}_4^-$ . (c) Five delocalized  $\pi$  CMOs in  $\text{La}^\oplus\text{B}_8\text{C}_4^-$ .

**Figure S8.** Occupied canonical molecular orbitals (CMOs) of the  $C_{4v}$  ( $^2B_1$ ) GM  $\text{La}^\oplus\text{B}_8\text{C}_4$  cluster. (a) Twelve  $\sigma$  CMOs for 2c-2e B–C/B–B Lewis  $\sigma$  bonds in  $\text{B}_8\text{C}_4$  ring. (b) Five delocalized  $\sigma$  CMOs in  $\text{La}^\oplus\text{B}_8\text{C}_4$ . (c) Five delocalized  $\pi$  CMOs in  $\text{La}^\oplus\text{B}_8\text{C}_4$ , the SOMO represents single occupation.

**Figure S9.** Chemical bonding pattern of the  $C_{4v}$  ( $^2B_1$ ) GM  $\text{La}^\oplus\text{B}_8\text{C}_4$  cluster based on the unrestricted adaptive natural density partitioning (UAdNDP) analysis. Occupation numbers (ONs) are indicated.

**Figure S10.** The calculated  $\sigma$  and  $\pi$ -ring current images of  $C_{4v}$  ( $^1A_1$ ) GM  $\text{La}^\oplus\text{B}_8\text{C}_4^+$  and  $D_{4h}$  ( $^1A_{1g}$ ) LM  $\text{La}^\oplus\text{B}_8\text{C}_4^-$  clusters. The external magnetic field is perpendicular to the molecular wheels.

**Figure S11.** The energy cycle of  $C_{4v}$  ( ${}^2B_1$ ) GM La@B<sub>8</sub>C<sub>4</sub> cluster, along with the isomerization energy of B<sub>8</sub>C<sub>4</sub> ring, bond dissociation energy (BDE) and inherent interaction energy between the central Y and B<sub>8</sub>C<sub>4</sub> ring (in kcal mol<sup>-1</sup>).

**Figure S1.** Alternative optimized Low-lying isomers of  $\text{La}@\text{B}_8\text{C}_4^+$  cluster. The relative energies are shown at the single-point CCSD(T) (for top five), B3LYP (in square brackets) and PBE0 (in curly brackets) levels, respectively. The relative energies at the B3LYP and PBE0 levels are corrected with the zero-point energies (ZPEs). All energies are in eV.

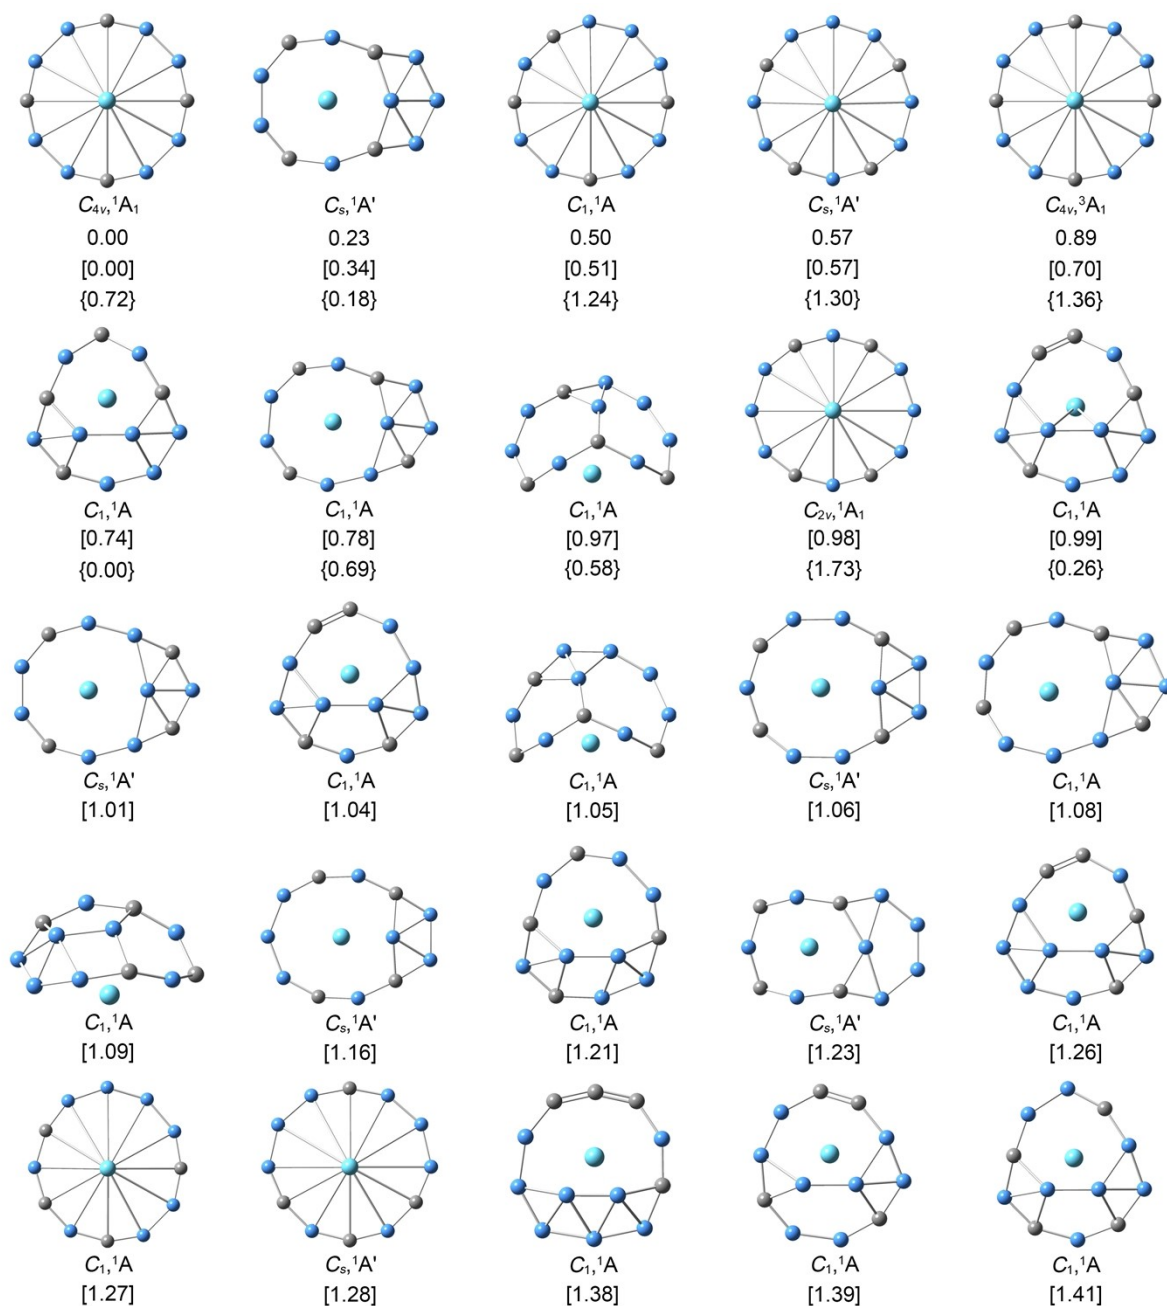

Continue .....

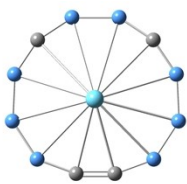

$C_s, 1A'$   
[1.46]

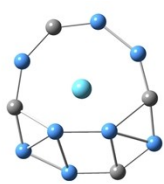

$C_1, 1A$   
[1.50]

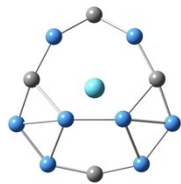

$C_s, 1A'$   
[1.52]

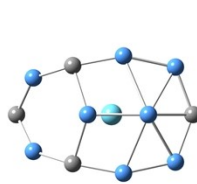

$C_s, 1A'$   
[1.54]

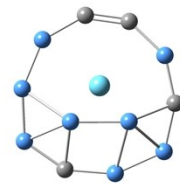

$C_1, 1A$   
[1.55]

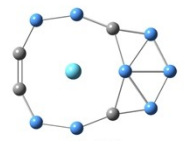

$C_s, 1A'$   
[1.55]

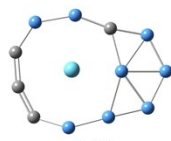

$C_1, 1A$   
[1.57]

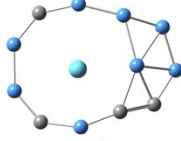

$C_1, 1A$   
[1.58]

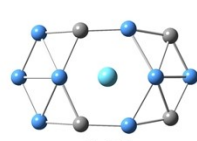

$C_s, 1A'$   
[1.67]

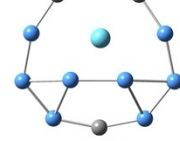

$C_s, 1A'$   
[1.70]

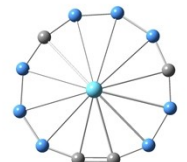

$C_s, 1A'$   
[1.74]

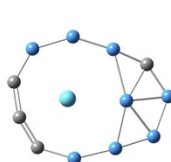

$C_1, 1A$   
[1.81]

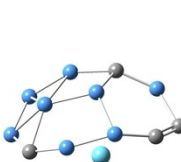

$C_1, 1A$   
[1.83]

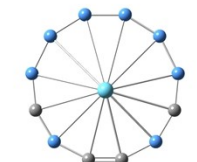

$C_s, 1A'$   
[1.84]

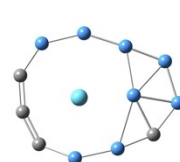

$C_1, 1A$   
[1.85]

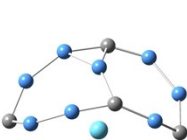

$C_1, 1A$   
[1.86]

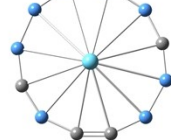

$C_1, 1A$   
[1.87]

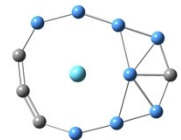

$C_1, 1A$   
[1.98]

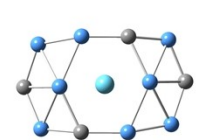

$C_2, 1A$   
[1.98]

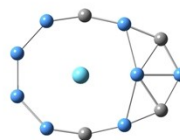

$C_s, 1A'$   
[1.99]

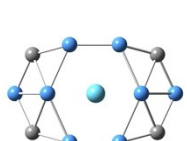

$C_{2v}, 1A_1$   
[2.02]

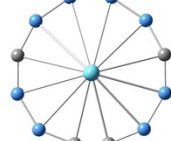

$C_s, 1A'$   
[2.09]

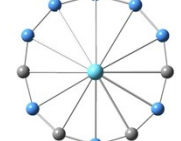

$C_s, 1A'$   
[2.11]

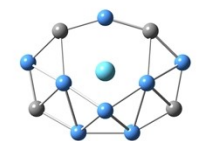

$C_s, 1A'$   
[2.15]

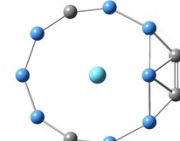

$C_s, 1A'$   
[2.30]

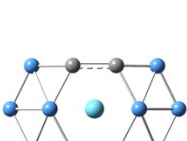

$C_{2v}, 1A_1$   
[2.35]

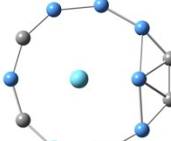

$C_s, 1A'$   
[2.42]

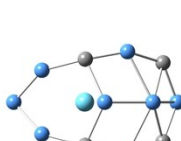

$C_s, 1A'$   
[2.46]

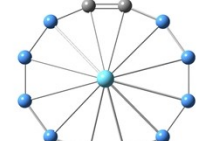

$C_{2v}, 1A_1$   
[2.57]

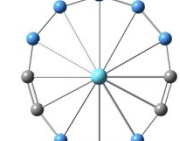

$C_s, 1A'$   
[2.66]

Continue .....

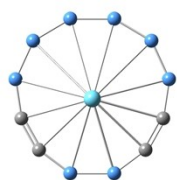

$C_s, 1A'$   
[2.85]

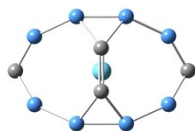

$C_{2v}, 1A_1$   
[2.89]

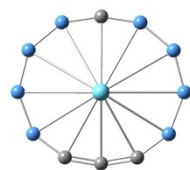

$C_s, 1A'$   
[2.89]

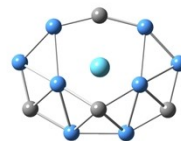

$C_s, 1A'$   
[3.02]

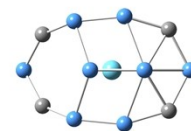

$C_s, 1A'$   
[3.03]

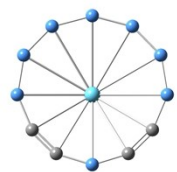

$C_s, 1A'$   
[3.08]

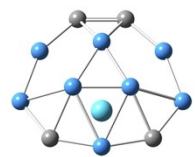

$C_s, 1A'$   
[3.16]

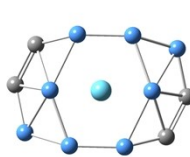

$C_2, 1A$   
[3.18]

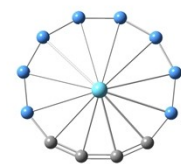

$C_s, 1A'$   
[4.07]

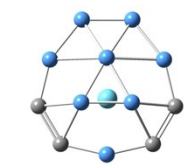

$C_s, 1A'$   
[4.09]

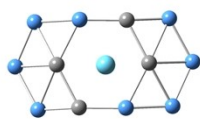

$C_2, 1A$   
[4.11]

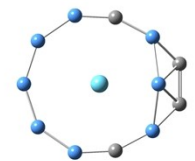

$C_s, 1A'$   
[4.11]

**Figure S2** The top eleven Low-lying isomers of  $\text{La}@\text{B}_8\text{C}_4$  cluster. The relative energies are shown at the single-point CCSD(T) (for top five), B3LYP (in square brackets) and PBE0 (in curly brackets) levels, respectively. The relative energies at the B3LYP and PBE0 levels are corrected with the zero-point energies (ZPEs). All energies are in eV.

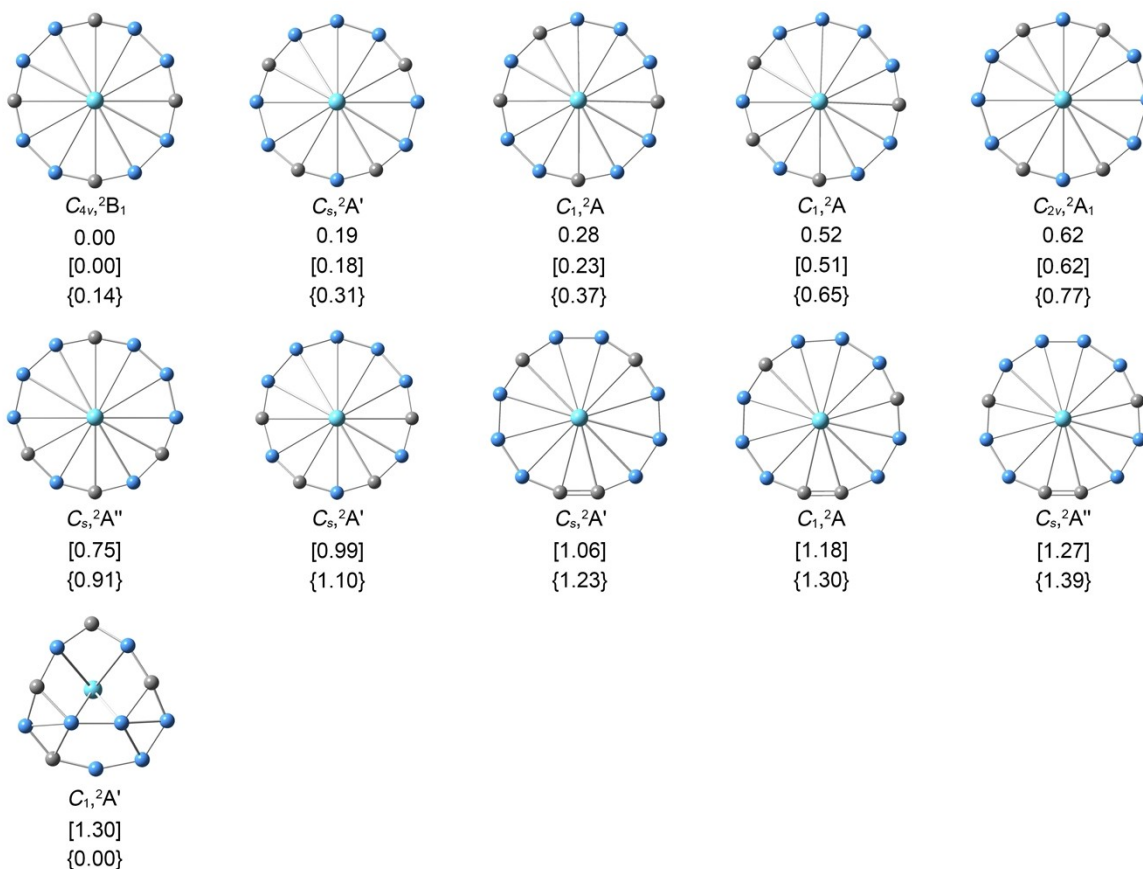

**Figure S3** The top ten Low-lying isomers of  $\text{La@B}_8\text{C}_4^-$  cluster. The relative energies are shown at the single-point CCSD(T) (for top five), B3LYP (in square brackets) and PBE0 (in curly brackets) levels, respectively. The relative energies at the B3LYP and PBE0 levels are corrected with the zero-point energies (ZPEs). All energies are in eV.

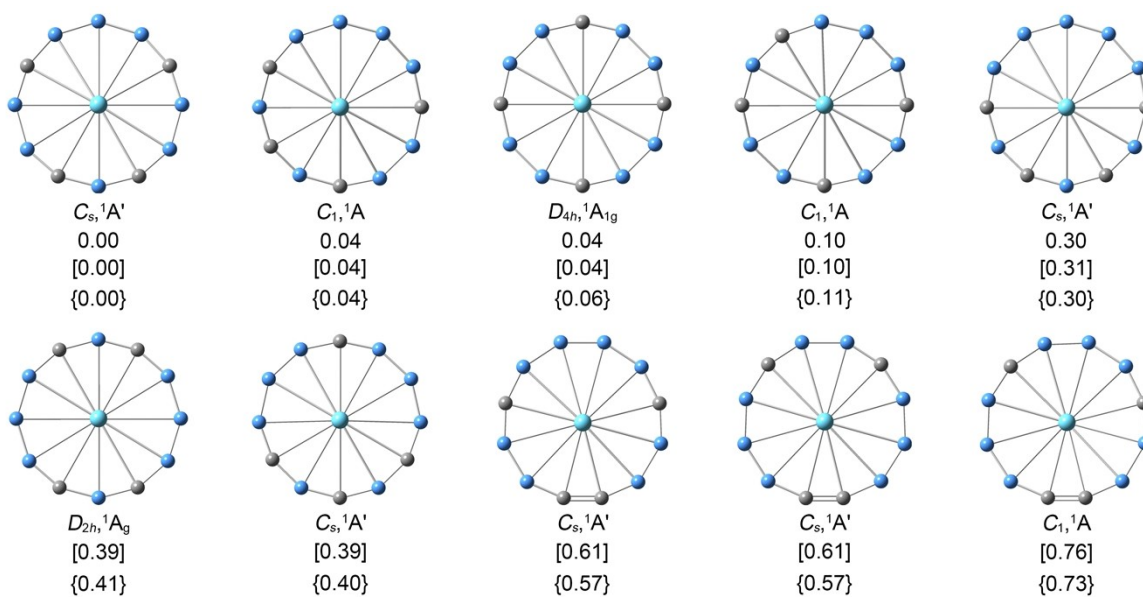



**Figure S4.** Calculated Wiberg bond indices (WBIs) of the  $C_{4v}$  ( $^1A_1$ ) GM  $\text{La}@\text{B}_8\text{C}_4^+$ ,  $C_{4v}$  GM ( $^2B_1$ )  $\text{La}@\text{B}_8\text{C}_4$  and  $D_{4h}$  ( $^1A_{1g}$ ) LM  $\text{La}@\text{B}_8\text{C}_4^-$  clusters from the natural bond orbital (NBO) analyses at B3LYP level.

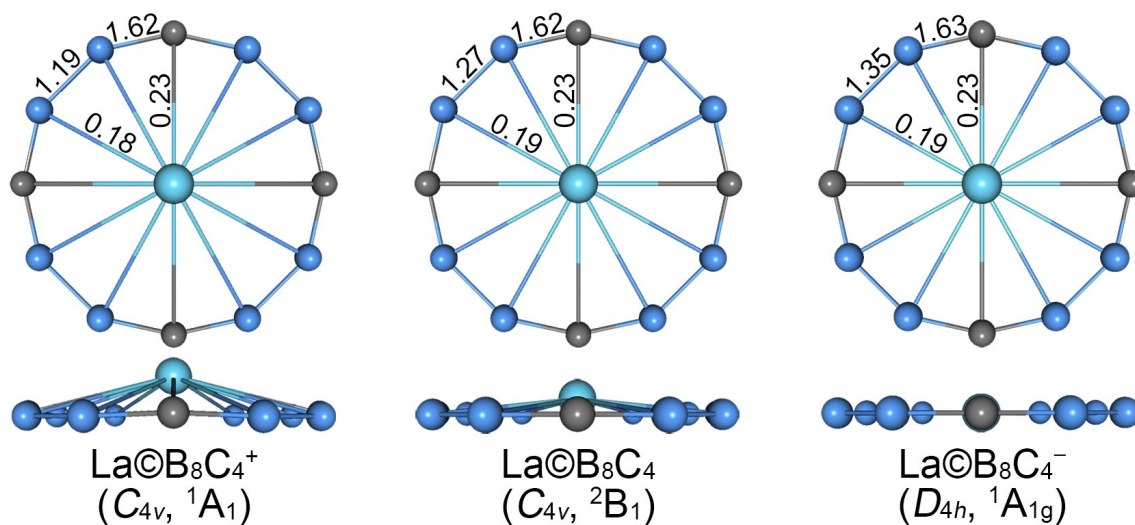

**Figure S5.** Calculated natural atomic charges of the  $C_{4v}$  ( $^1A_1$ ) GM  $\text{La}\text{C}\text{B}_8\text{C}_4^+$ , GM  $C_{4v}$  ( $^2B_1$ )  $\text{La}\text{C}\text{B}_8\text{C}_4$  and  $D_{4h}$  LM ( $^1A_{1g}$ )  $\text{La}\text{C}\text{B}_8\text{C}_4^-$  clusters from the natural bond orbital (NBO) analyses at B3LYP level.

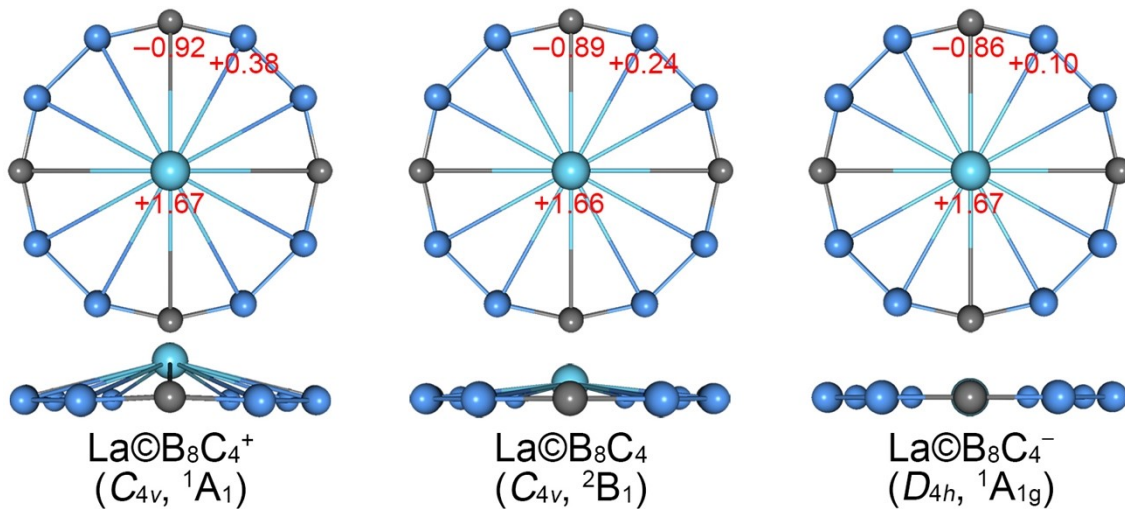

**Figure S6.** Occupied canonical molecular orbitals (CMOs) of the  $C_{4v}$  ( $^1A_1$ ) GM  $\text{La}\text{C}\text{B}_8\text{C}_4^+$  cluster. (a) Twelve  $\sigma$  CMOs for two-center two-electron (2c-2e) B–C/B–B Lewis  $\sigma$  bonds in  $\text{B}_8\text{C}_4$  ring. (b) Five delocalized  $\sigma$  CMOs in  $\text{La}\text{C}\text{B}_8\text{C}_4^+$ . (c) Four delocalized  $\pi$  CMOs in  $\text{La}\text{C}\text{B}_8\text{C}_4^+$ .

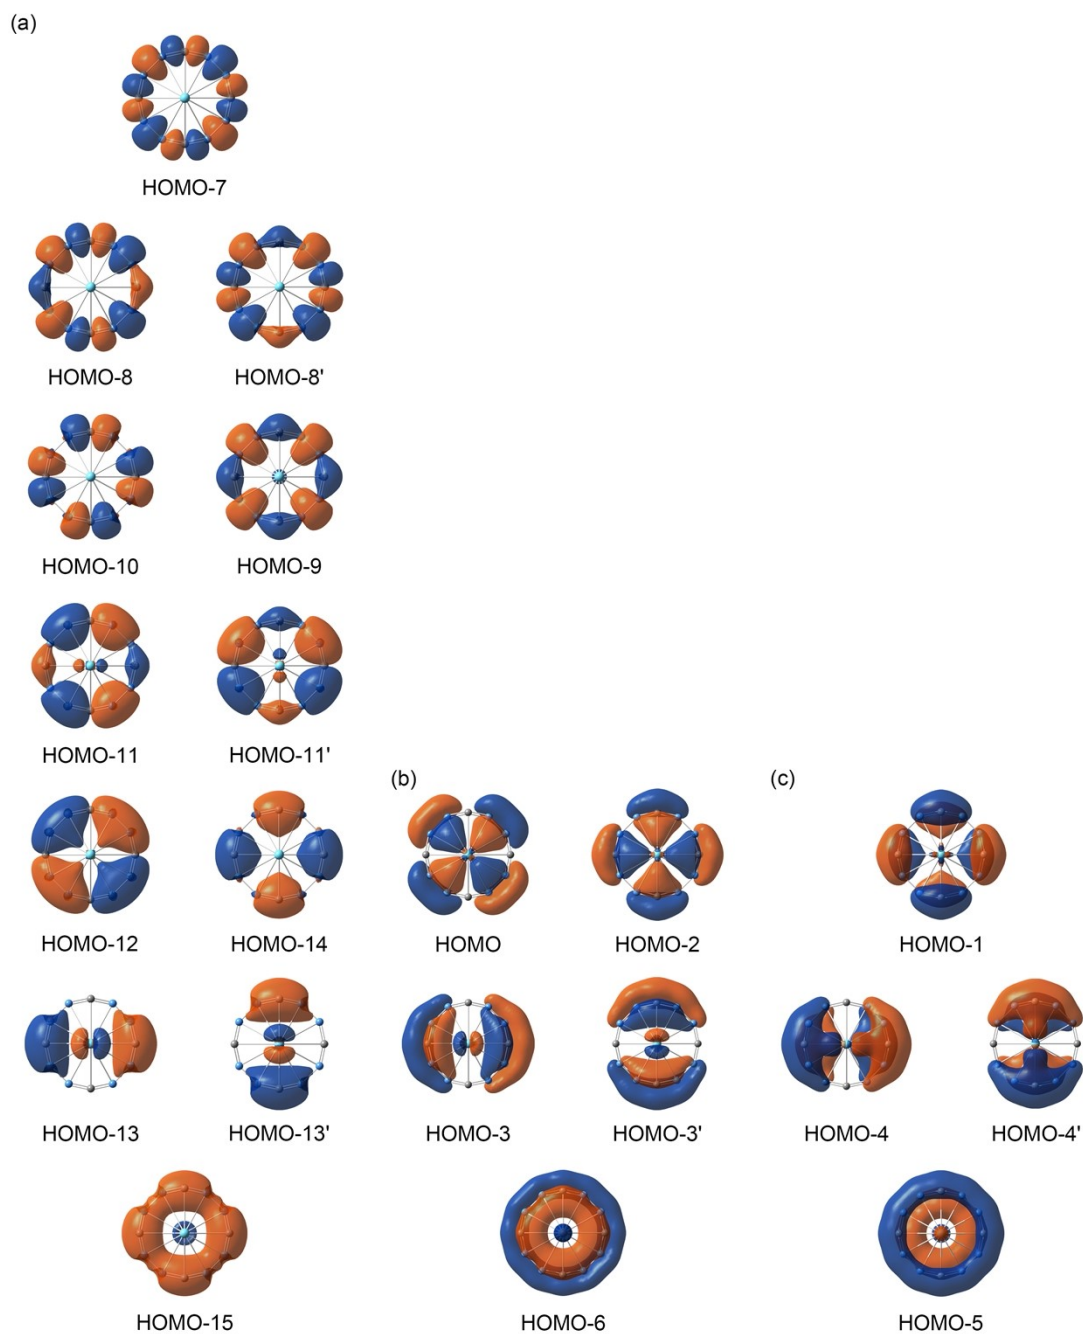

**Figure S7.** Occupied canonical molecular orbitals (CMOs) of the  $D_{4h}$  ( $^1A_{1g}$ ) LM  $\text{La}@\text{B}_8\text{C}_4^-$  cluster. (a) Twelve  $\sigma$  CMOs for  $2c-2e$  B–C/B–B Lewis  $\sigma$  bonds in  $\text{B}_8\text{C}_4$  ring. (b) Five delocalized  $\sigma$  CMOs in  $\text{La}@\text{B}_8\text{C}_4^-$ . (c) Five delocalized  $\pi$  CMOs in  $\text{La}@\text{B}_8\text{C}_4^-$ .

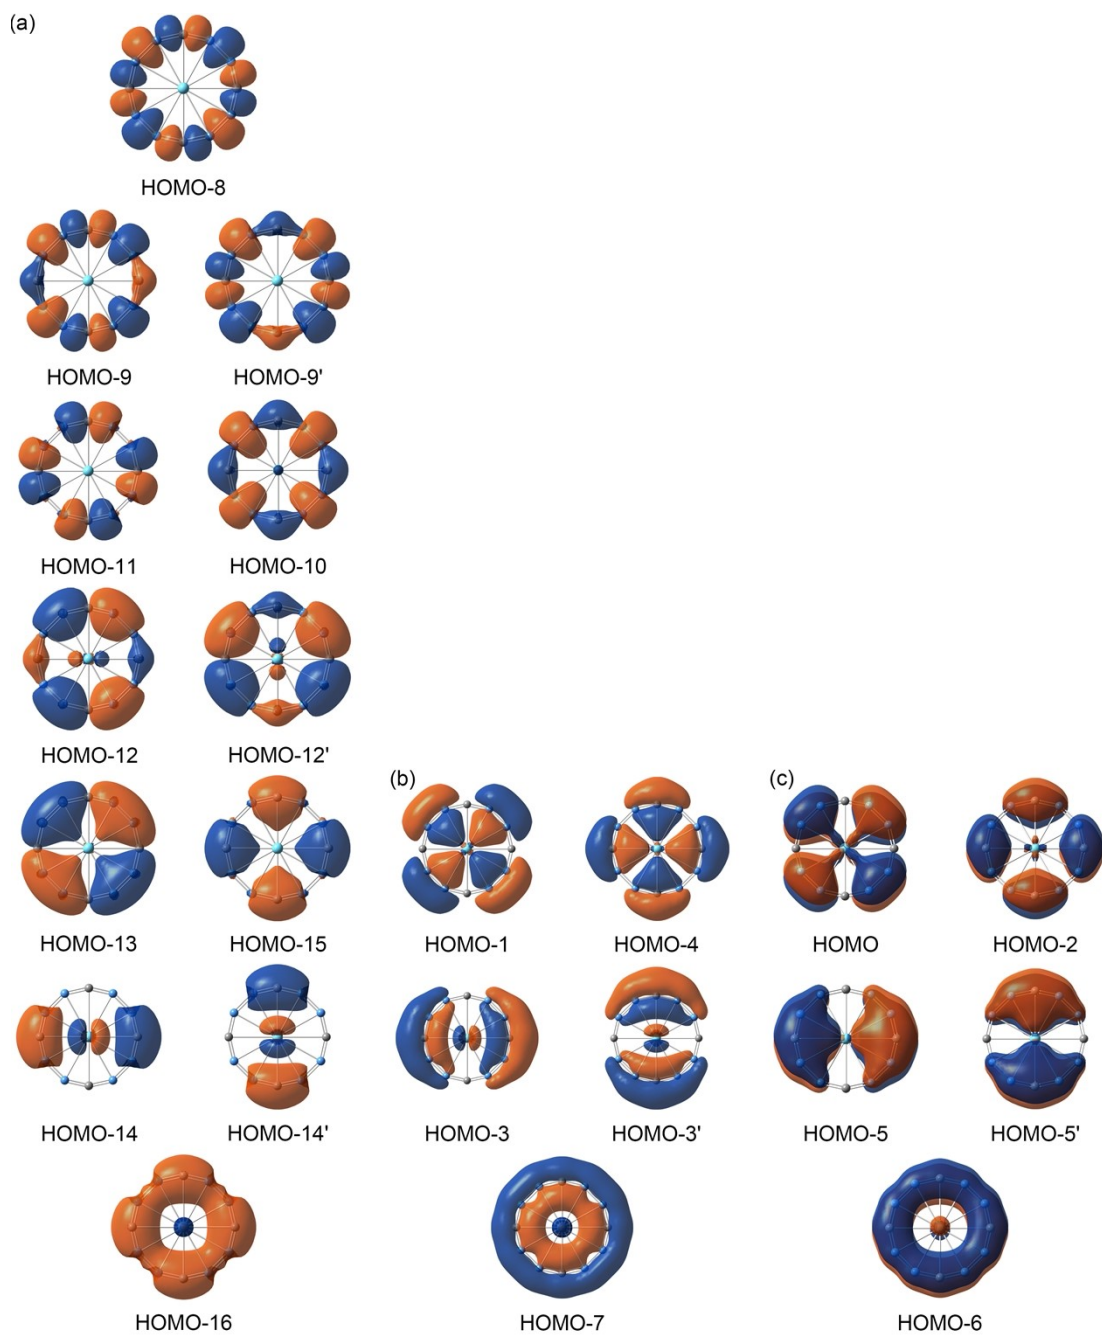

**Figure S8.** Occupied canonical molecular orbitals (CMOs) of the  $C_{4v}$  ( $^2B_1$ ) GM  $\text{La}\text{C}\text{B}_8\text{C}_4$  cluster. (a) Twelve  $\sigma$  CMOs for  $2c-2e$  B–C/B–B Lewis  $\sigma$  bonds in  $\text{B}_8\text{C}_4$  ring. (b) Five delocalized  $\sigma$  CMOs in  $\text{La}\text{C}\text{B}_8\text{C}_4$ . (c) Five delocalized  $\pi$  CMOs in  $\text{La}\text{C}\text{B}_8\text{C}_4$ , the SOMO represents single occupation.

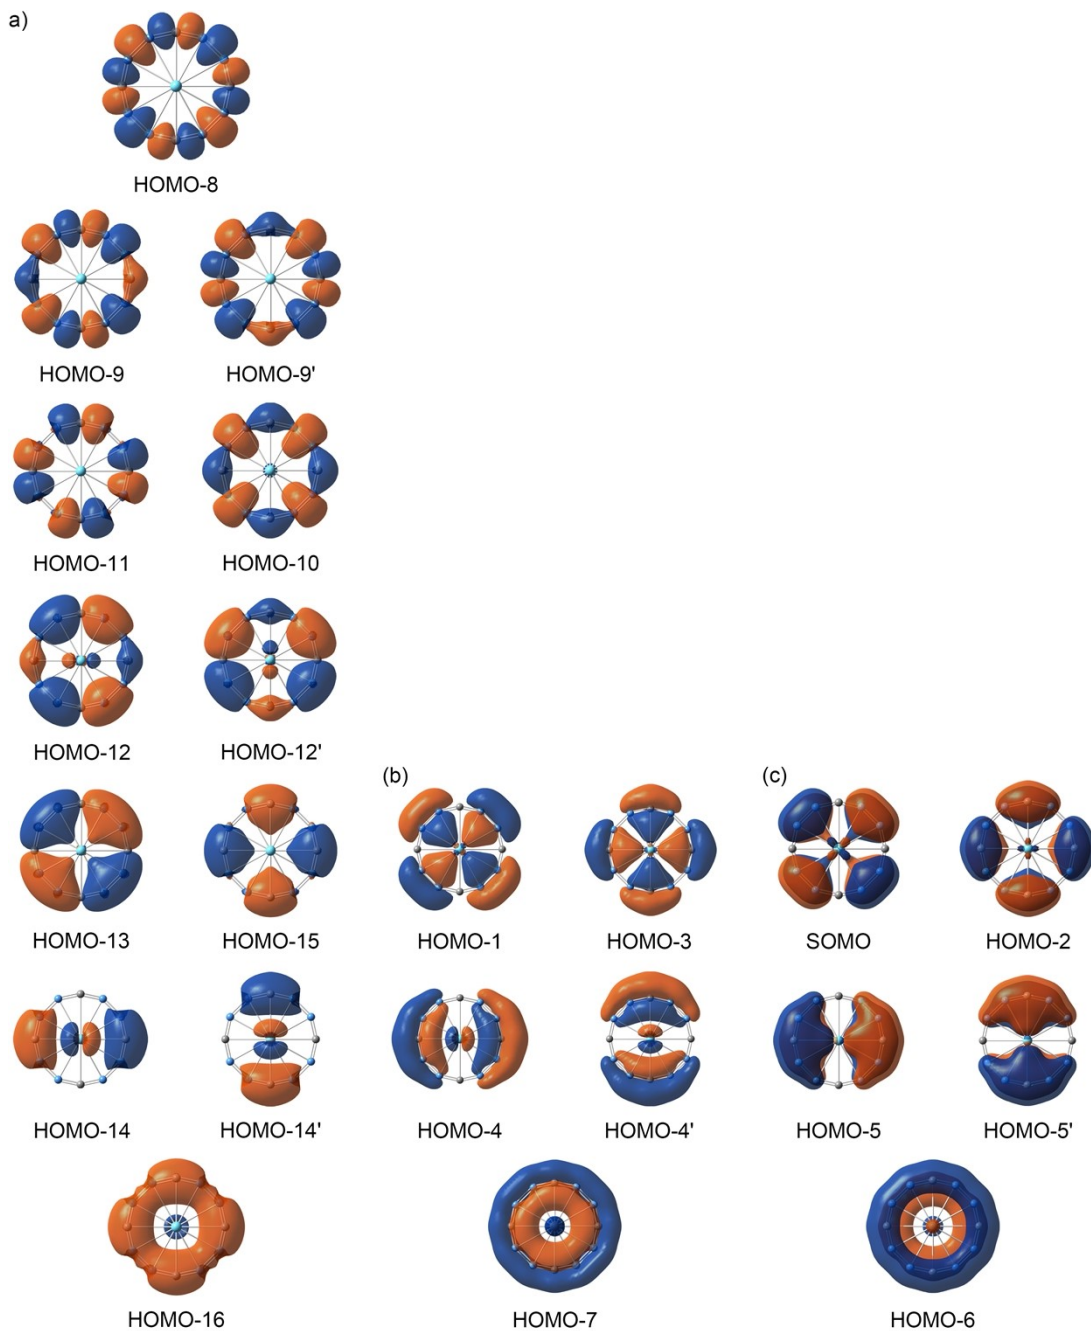

**Figure S9.** Chemical bonding pattern of the  $C_{4v}$  ( ${}^2B_1$ ) GM  $\text{La}@\text{B}_8\text{C}_4$  cluster based on the unrestricted adaptive natural density partitioning (UAdNDP) analysis. Occupation numbers (ONs) are indicated.

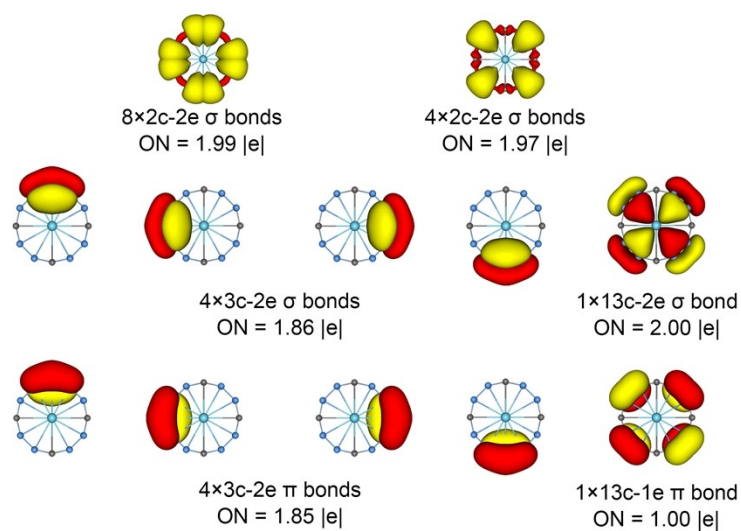

**Figure S10.** The calculated  $\sigma$  and  $\pi$ -ring current images of  $C_{4v}$  ( $^1A_1$ ) GM  $\text{La}\text{C}\text{B}_8\text{C}_4^+$  and  $D_{4h}$  ( $^1A_{1g}$ ) LM  $\text{La}\text{C}\text{B}_8\text{C}_4^-$  clusters. The external magnetic field is perpendicular to the molecular wheels.

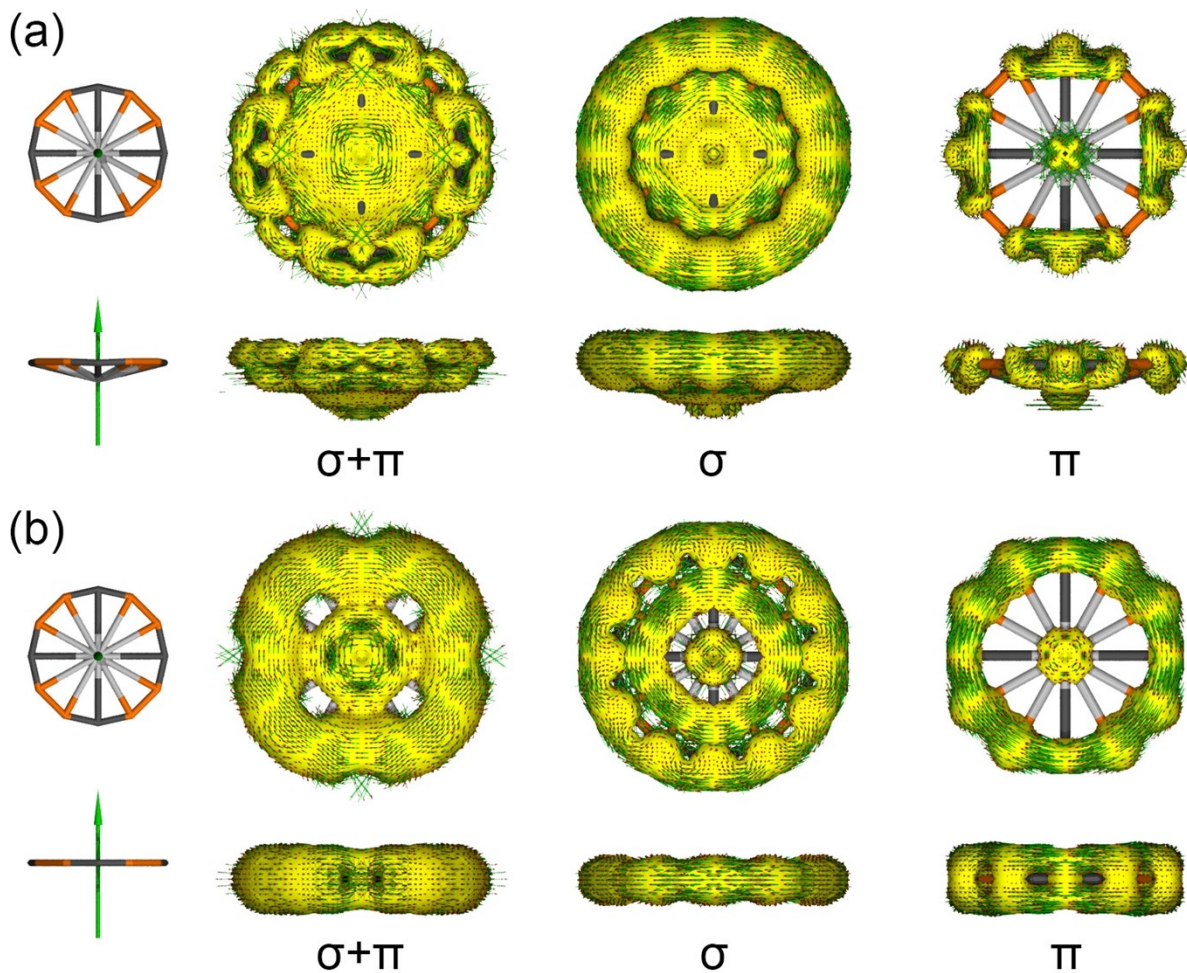

**Figure S11.** The energy cycle of  $C_{4v}$  ( $^2B_1$ ) GM  $\text{La}\text{C}\text{B}_8\text{C}_4$  cluster, along with the isomerization energy of  $\text{B}_8\text{C}_4$  ring, bond dissociation energy (BDE) and inherent interaction energy between the central Y and  $\text{B}_8\text{C}_4$  ring (in  $\text{kcal mol}^{-1}$ ).

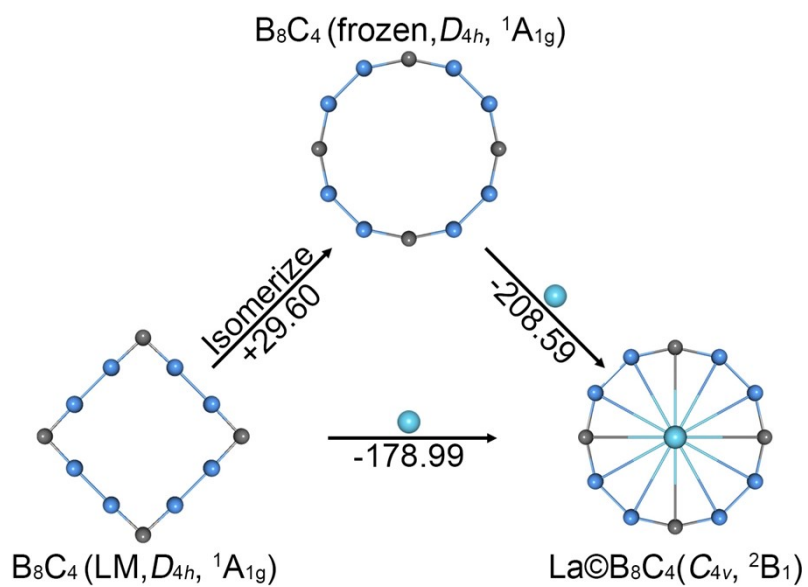



**Table S1.** Cartesian coordinates for the  $C_{4v}$  ( $^1A_1$ ) GM  $\text{La}\text{C}\text{B}_8\text{C}_4^+$ ,  $C_{4v}$  ( $^2B_1$ ) GM  $\text{La}\text{C}\text{B}_8\text{C}_4$ , and  $D_{4h}$  ( $^1A_{1g}$ ) LM  $\text{La}\text{C}\text{B}_8\text{C}_4^-$  clusters at B3LYP level.

**$\text{La}\text{C}\text{B}_8\text{C}_4^+$  GM ( $C_{4v}$ ,  $^1A_1$ )**

|    |             |             |             |
|----|-------------|-------------|-------------|
| B  | 1.35113700  | 2.46442600  | -0.36429900 |
| B  | -1.35113700 | 2.46442600  | -0.36429900 |
| B  | -2.46442600 | 1.35113700  | -0.36429900 |
| B  | -2.46442600 | -1.35113700 | -0.36429900 |
| B  | -1.35113700 | -2.46442600 | -0.36429900 |
| B  | 1.35113700  | -2.46442600 | -0.36429900 |
| B  | 2.46442600  | -1.35113700 | -0.36429900 |
| B  | 2.46442600  | 1.35113700  | -0.36429900 |
| C  | 0.00000000  | 2.75120900  | -0.30958500 |
| C  | 2.75120900  | 0.00000000  | -0.30958500 |
| C  | 0.00000000  | -2.75120900 | -0.30958500 |
| C  | -2.75120900 | 0.00000000  | -0.30958500 |
| La | 0.00000000  | 0.00000000  | 0.38600000  |

**$\text{La}\text{C}\text{B}_8\text{C}_4$  GM ( $C_{4v}$ ,  $^2B_1$ )**

|   |             |             |             |
|---|-------------|-------------|-------------|
| B | 1.35917900  | 2.46062800  | -0.22652300 |
| B | -1.35917900 | 2.46062800  | -0.22652300 |
| B | -2.46062800 | 1.35917900  | -0.22652300 |
| B | -2.46062800 | -1.35917900 | -0.22652300 |
| B | -1.35917900 | -2.46062800 | -0.22652300 |
| B | 1.35917900  | -2.46062800 | -0.22652300 |
| B | 2.46062800  | -1.35917900 | -0.22652300 |

|    |             |             |             |
|----|-------------|-------------|-------------|
| B  | 2.46062800  | 1.35917900  | -0.22652300 |
| C  | 0.00000000  | 2.75395800  | -0.20845200 |
| C  | 2.75395800  | 0.00000000  | -0.20845200 |
| C  | 0.00000000  | -2.75395800 | -0.20845200 |
| C  | -2.75395800 | 0.00000000  | -0.20845200 |
| La | 0.00000000  | 0.00000000  | 0.24673200  |

**La@B<sub>8</sub>C<sub>4</sub><sup>-</sup> LM (*D*<sub>4h</sub>, <sup>1</sup>A<sub>1g</sub>)**

|    |             |             |            |
|----|-------------|-------------|------------|
| B  | 1.36568600  | 2.45956300  | 0.00000000 |
| B  | -1.36568600 | 2.45956300  | 0.00000000 |
| B  | -2.45956300 | 1.36568600  | 0.00000000 |
| B  | -2.45956300 | -1.36568600 | 0.00000000 |
| B  | -1.36568600 | -2.45956300 | 0.00000000 |
| B  | 1.36568600  | -2.45956300 | 0.00000000 |
| B  | 2.45956300  | -1.36568600 | 0.00000000 |
| B  | 2.45956300  | 1.36568600  | 0.00000000 |
| C  | 0.00000000  | 2.76590000  | 0.00000000 |
| C  | 2.76590000  | 0.00000000  | 0.00000000 |
| C  | 0.00000000  | -2.76590000 | 0.00000000 |
| C  | -2.76590000 | 0.00000000  | 0.00000000 |
| La | 0.00000000  | 0.00000000  | 0.00000000 |
